# Supplementary material for: Rapid genome-scale mapping of chromatin accessibility in tissue
Source: PubMed Central journal article supplement (PMC3464876; doi:10.1186/1756-8935-5-10), 2012-06-26
Supplement: 1756-8935-5-10-S1.pdf [file 1756-8935-5-10-S1.pdf]

# Grontved\_Supplementary\_Fig1

| Sample             | Aligned tags (millions) | Aligned tags to mito genome (millions) |
|--------------------|-------------------------|----------------------------------------|
| DNase I (rep1)     | 27.8                    | 0.33                                   |
| DNase I (rep 2)    | 27.0                    | 0.44                                   |
| Benzonase 0.25U/ml | 21.7                    | 3.52                                   |
| Benzonase 1U/ml    | 22.3                    | 4.21                                   |
| Benzonase 4U/ml    | 23.4                    | 3.98                                   |
| Cyanase 0.25U/ml   | 17.1                    | 3.83                                   |
| Cyanase 1U/ml      | 20.7                    | 4.91                                   |
| Cyanase 4U/ml      | 23.9                    | 6.43                                   |

# Grontved\_Supplementary\_Fig2

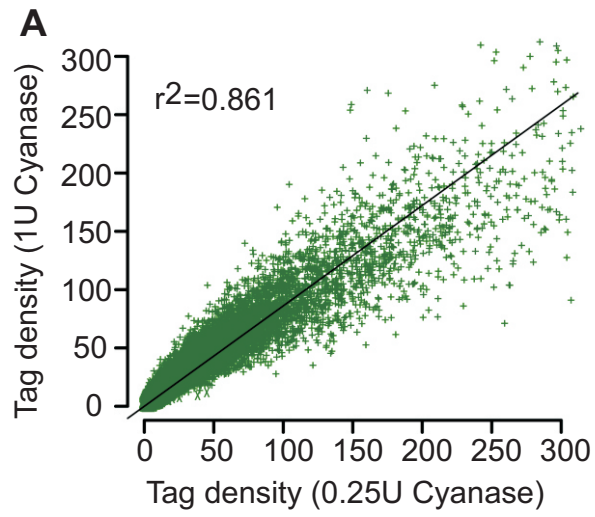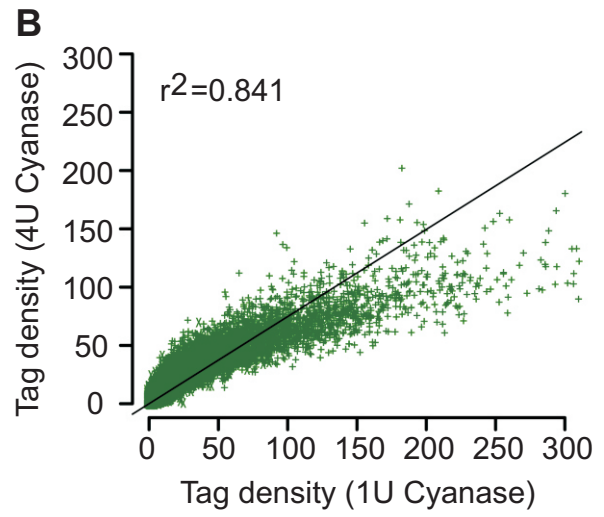

# Grontved\_Supplementary\_Fig3

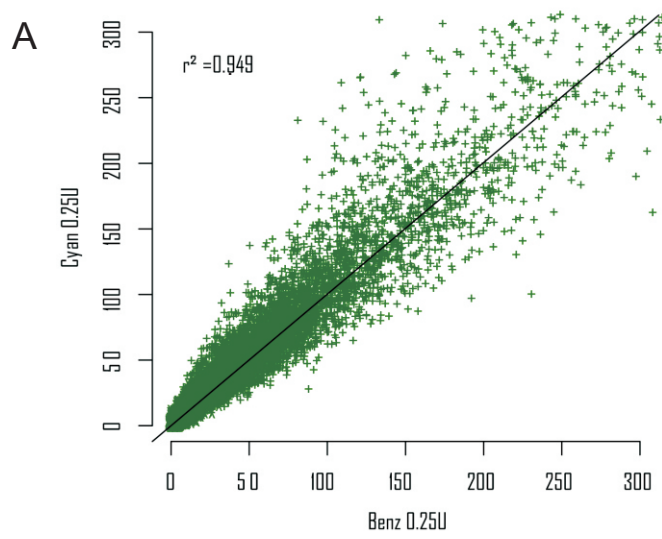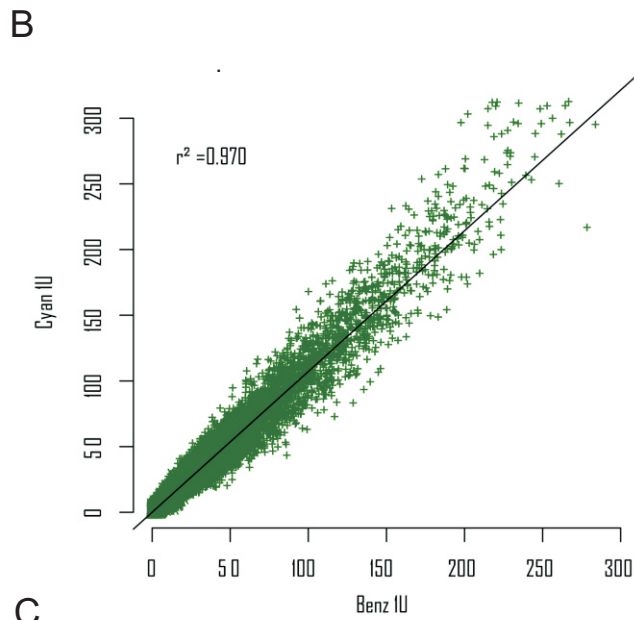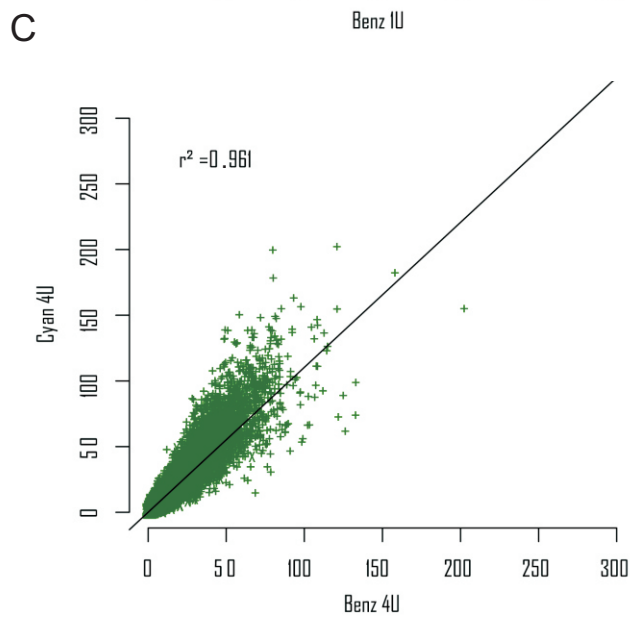

# Grontved\_Supplementary\_Fig4

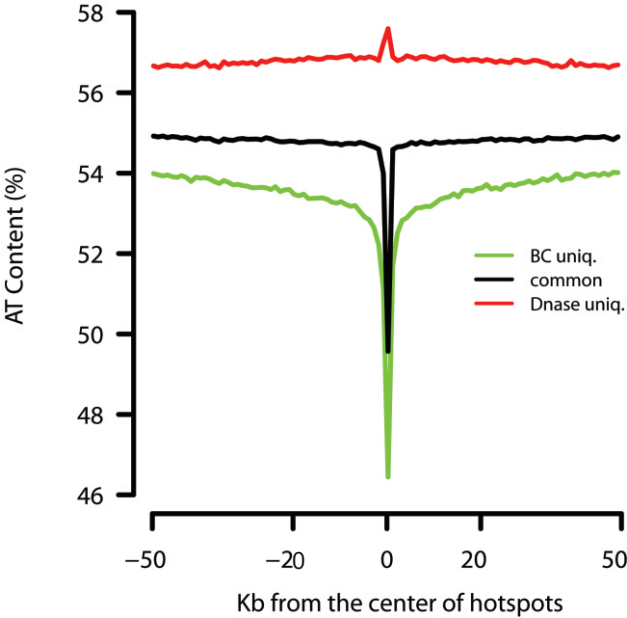

Supplementary figure legends\_Grontved et al

**Supplementary figure 1.** Aligned tags from DNase I, Benzonase and Cyanase digestions of chromatin from nuclei and frozen mouse liver tissue. Tags were aligned to mm9 and to the mitochondrial (mito) genome.

**Supplementary figure 2.** Scatter plot of hotspot tag density from liver tissue digested with Cyanase. (A) 0.25U/ml vs. 1U/ml. (B) 1U/ml vs. 4U/ml.

**Supplementary figure 3.** Scatter plot of hotspot tag density from liver tissue digested with different concentrations of Benzonase and Cyanase. (A) 0.25U/ml Benzonase vs. Cyanase. (B) 1U/ml Benzonase vs. Cyanase. (C) 4U/ml Benzonase vs. Cyanase.

**Supplementary figure 4.** Distribution of AT percentage surrounding DNase I/Benzonase/Cyanase (common), DNase I unique and Benzonase/Cyanase unique hotspots.
